# Supplementary material for: Genetically engineered probiotics for an optical imaging-guided tumor photothermal therapy/immunotherapy
Source: Royal Society of Chemistry journal article supplement (doi:10.1039/d3bm01227a), 2023-11-15
Supplement: d3bm01227a1.pdf [file d3bm01227a1.pdf]

## Genetically engineered probiotics for optical imaging-guided tumor photothermal /immunotherapy

*Xue Chen*<sup>a, 1</sup>, *Puze Li*<sup>a, 1</sup>, *Shiqiang Xie*<sup>a, 1</sup>, *Xiangliang Yang*<sup>a, b, c</sup>, *Ban Luo*<sup>e, f \*</sup> and *Jun Hu*<sup>a, b, c, d \*</sup>

<sup>a</sup> National Engineering Research Center for Nanomedicine, College of Life Science and Technology, Huazhong University of Science and Technology, Wuhan 430074, China

<sup>b</sup> Hubei Key Laboratory of Bioinorganic Chemistry and Materia Medica, School of Chemistry and Chemical Engineering, Huazhong University of Science and Technology, Wuhan 430074, China

<sup>c</sup> Key Laboratory of Molecular Biophysics of Ministry of Education, College of Life Science and Technology, Huazhong University of Science and Technology, Wuhan 430074, China

<sup>d</sup> Hubei Jiangxia Laboratory, 430200, Wuhan, China

<sup>e</sup> Department of Ophthalmology, Tongji Hospital, Tongji Medical College, Huazhong University of Science and Technology, Wuhan 430030, China

<sup>f</sup> Department of Ophthalmology, Wenchang People's Hospital, Wenchang, 571321, China

\* Corresponding author

E-mail: [hjun0718@hust.edu.cn](mailto:hjun0718@hust.edu.cn), [banluoeye@hust.edu.cn](mailto:banluoeye@hust.edu.cn)

<sup>1</sup> These authors contribute equally.

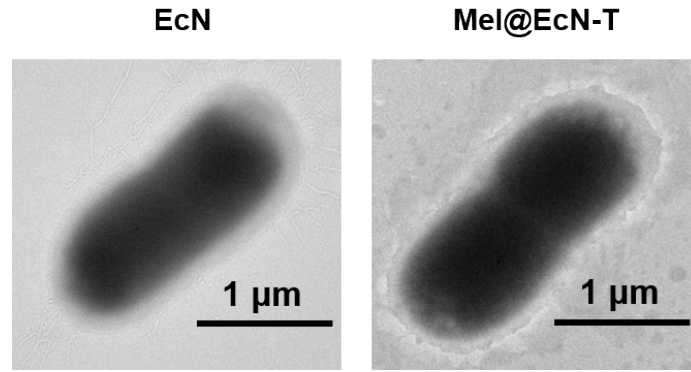

**Fig. S1** TEM image of EcN and Mel@EcN-T.

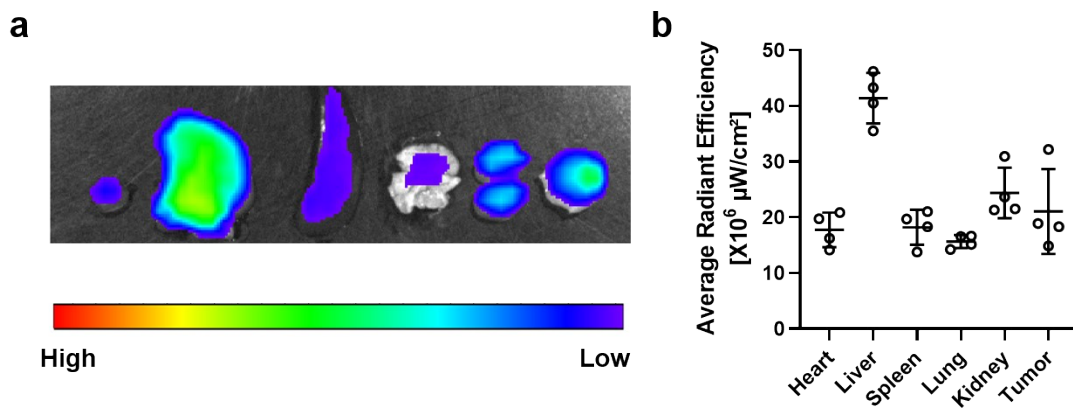

**Fig. S2** The biodistribution of Cy5-Mel@EcN-T. a) Representative image and the corresponding quantitative analysis of major organs (heart, liver, spleen, lung and kidney) harvested at 120 h after intravenous injection of Cy5-Mel@EcN-T (n = 4).

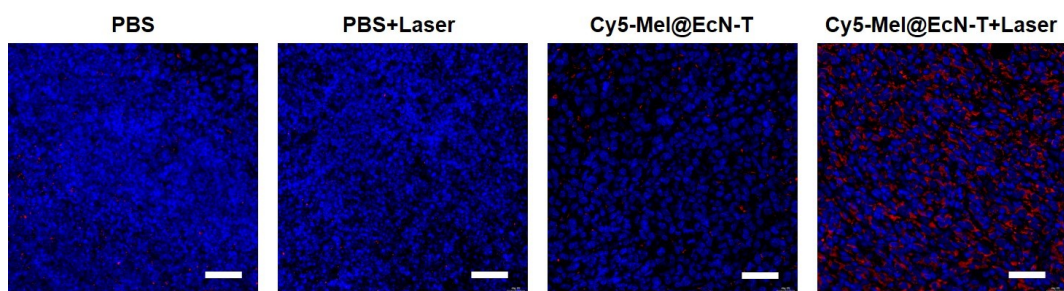

**Fig. S3** Calreticulin staining of tumor sections after different treatment, blue was DAPI signal, red was calreticulin signal.
